# Supplementary material
Source: publisher figshare collection journal article supplement (https://karger.figshare.com/ndownloader/files/20024024)

**Supplemental Figures**

**Fig S1. Adult and neonatal PRP aggregation response.** Light transmission aggregometry was performed in PRP of CB samples (n=10) and adult samples (n=10) using 5 μM ADP, 25 μM TRAP, 5 μg/mL collagen. Values are mean plus standard deviation.* denotes p≤0.05.

**Fig S2. Inhibition of PRP aggregation by PGE1in adult and CB samples.**

Platelet rich plasma from CB (n≥5) and adult samples (n≥5) was pre-incubated with increasing doses of PGE1  (5 min, 37°C). Then, platelet aggregation was measured upon stimulation with 25 μM TRAP (A), 5 μM ADP (B) and 5 μg/mL collagen (C). Results are expressed as the mean of maximal aggregation values.


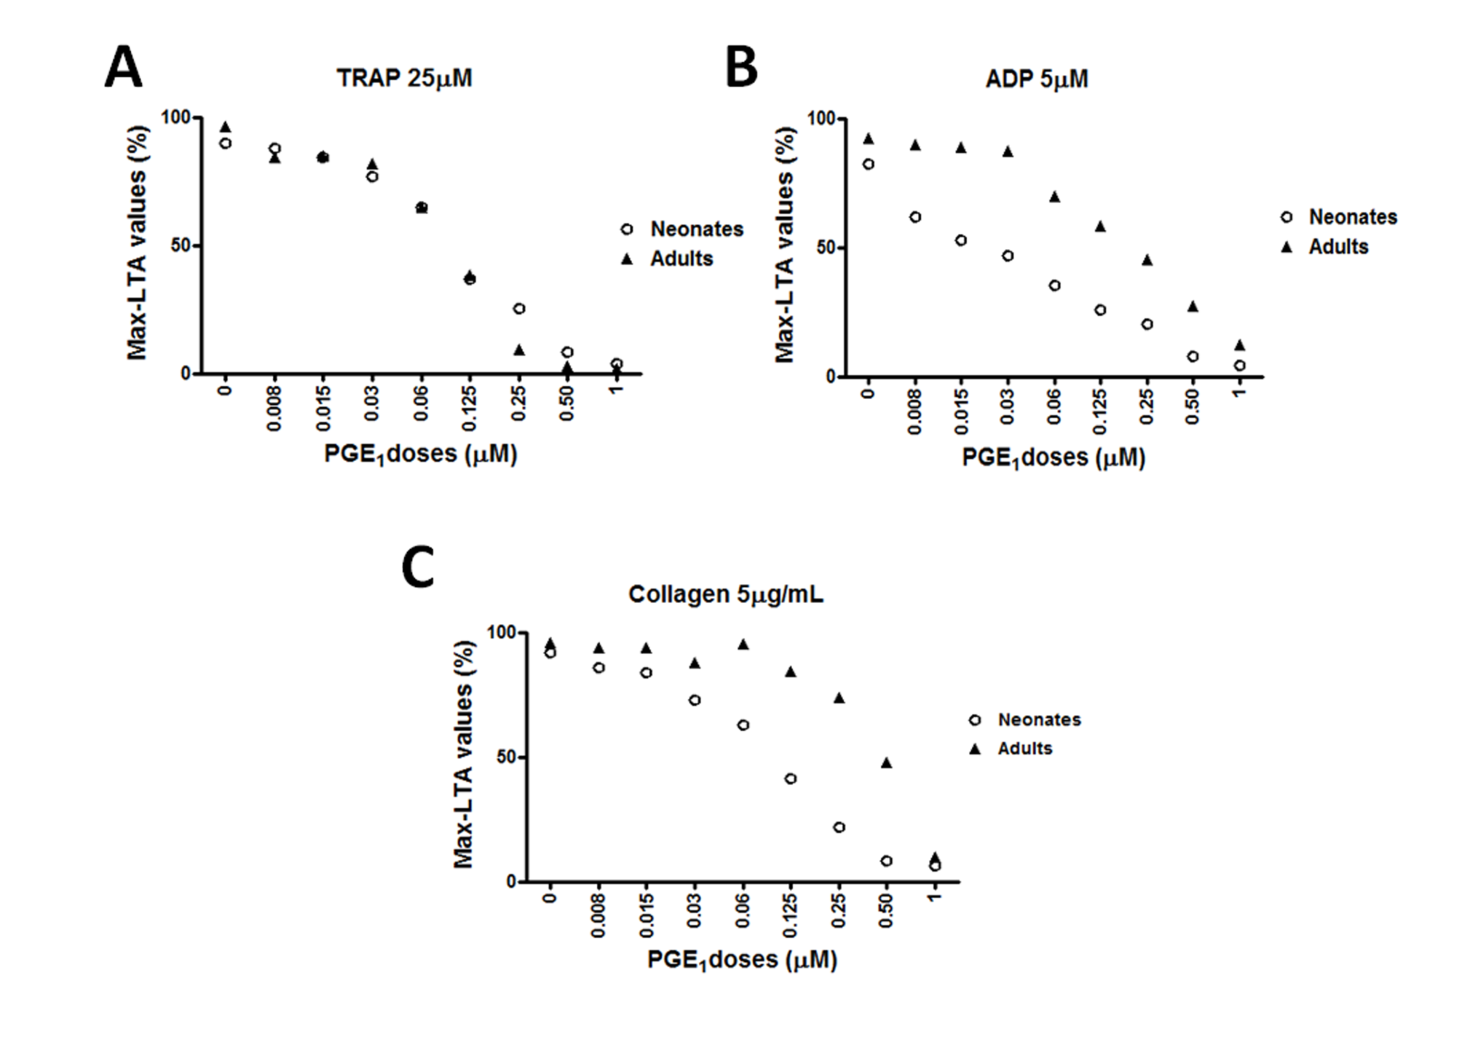

Supplement: Supplementary file 1 [file 20024024]
